# Supplementary material
Source: publisher figshare collection journal article supplement (https://acs.figshare.com/ndownloader/files/12927410)
Supplement: Supplementary file 1 [file 12927410]

# Design of Pyrene Scaffold Multifunctional Material: Real Time Turn-On Chemo Sensor for Nitric Oxide, AIEE Behavior and Detection of TNP Explosive

Abu Saleh Musha Islam†, Mihir Sasmal†, Debjani Maiti†, Ananya Dutta†, Bibhutibhushan Show† and Mahammad Ali \*†

†Department of Chemistry, Jadavpur University, 188 Raja S.C. Mallick Road, Kolkata 700 032, India.

E-mail: m\_ali2062@yahoo.com, mali@chemistry.jdvu.ac.in

| No. | Content.                                                                                                                                                                                                                                                                   | Figure.No.  |
|-----|----------------------------------------------------------------------------------------------------------------------------------------------------------------------------------------------------------------------------------------------------------------------------|-------------|
| 1.  | $^1\text{H}$ -NMR spectrum of $\text{L}^1$ in $\text{CDCl}_3$ .                                                                                                                                                                                                            | Figure S1.  |
| 2.  | Mass spectra of $\text{L}^1$ in $\text{CH}_3\text{CN}$ .                                                                                                                                                                                                                   | Figure S2.  |
| 3.  | $^1\text{H}$ -NMR spectrum of PyDA-NP in $\text{DMSO-d}_6$ .                                                                                                                                                                                                               | Figure S3   |
| 4.  | $^{13}\text{C}$ -NMR spectrum of PyDA-NP in $\text{DMSO-d}_6$ .                                                                                                                                                                                                            | Figure S4.  |
| 5.  | Mass spectra of PyDA-NP in $\text{CH}_3\text{CN}$ .                                                                                                                                                                                                                        | Figure S5.  |
| 6.  | IR spectrum of PyDA-NP.                                                                                                                                                                                                                                                    | Figure S6.  |
| 7.  | $^1\text{H}$ -NMR spectrum of PyDA-NP–NO in $\text{DMSO-d}_6$ .                                                                                                                                                                                                            | Figure S7.  |
| 8.  | Mass spectra of PyDA-NP–NO in $\text{CH}_3\text{CN}$ .                                                                                                                                                                                                                     | Figure S8.  |
| 9.  | IR spectrum of PyDA-NP–NO.                                                                                                                                                                                                                                                 | Figure S9.  |
| 10. | Fluorescence Response of PyDA-NP towards different anions.                                                                                                                                                                                                                 | Figure S10. |
| 11. | Fluorescence Response of PyDA-NP towards different cations.                                                                                                                                                                                                                | Figure S11. |
| 12. | Determination of LOD of PyDA-NH–NO.                                                                                                                                                                                                                                        | Figure S12. |
| 13. | X-ray diffraction patterns of stack images of (a) PyDA-NP (10 $\mu\text{M}$ ) in $\text{CH}_3\text{CN}$ , PyDA-NP (10 $\mu\text{M}$ ) at 30 %, 80 %, 100 % (water/ $\text{CH}_3\text{CN}$ ) and $\text{NO}^+$ (80 $\mu\text{M}$ ) in 5 % (water/ $\text{CH}_3\text{CN}$ ). | Figure S13. |

|     |                                                                                                                                                      |             |
|-----|------------------------------------------------------------------------------------------------------------------------------------------------------|-------------|
| 14. | Crystallite size (D) and dislocation density ( $\delta$ ) at different peaks of hybrid PyDA-NP films.                                                | Table S1.   |
| 15. | Fluorescence life time spectra of <b>PyDA-NP</b> at different % of water in the H <sub>2</sub> O/CH <sub>3</sub> CN binary mixture solution.         | Figure S14. |
| 16. | Different photophysical data of <b>PyDA-NP</b> at different % of water in the H <sub>2</sub> O/CH <sub>3</sub> CN binary mixture solution            | Table S2.   |
| 17. | Plot of Quantum Yield vs % of water and CH <sub>3</sub> CN of PyDA-NP.                                                                               | Figure S15. |
| 18. | (a) Titration of 2,4-DNP upto 10 times more concentration than TNP (250 $\mu$ M) and after that addition of TNP. (b) over selectivity study for TNP. | Figure S16. |
| 19. | Fluorescence life time spectra of <b>PyDA-NP</b> at 80 % of water in the presence of different concentration of TNP.                                 | Figure S17. |
| 20. | Fluorescence life time data of <b>PyDA-NP</b> at 80 % of water in the presence of different concentration of TNP.                                    | Table S3.   |
| 21. | UV-Vis absorption spectrum of the PyDA-NP (10 $\mu$ M) at AIEE state (80% water) in the presence of TNP (240 $\mu$ M).                               | Figure S18. |

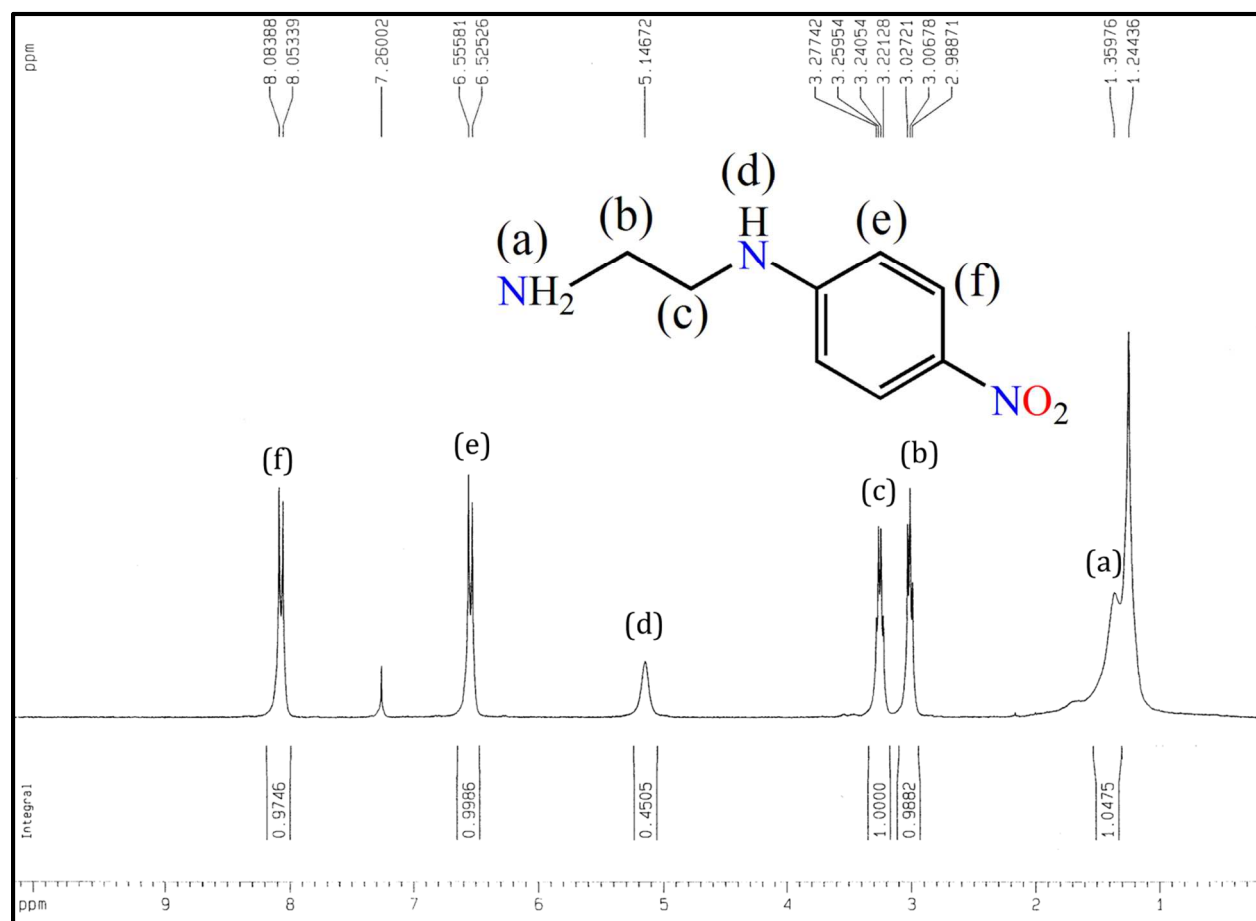

Figure S1.  $^1H$ -NMR spectrum of  $L^1$  in DMSO- $d_6$ .

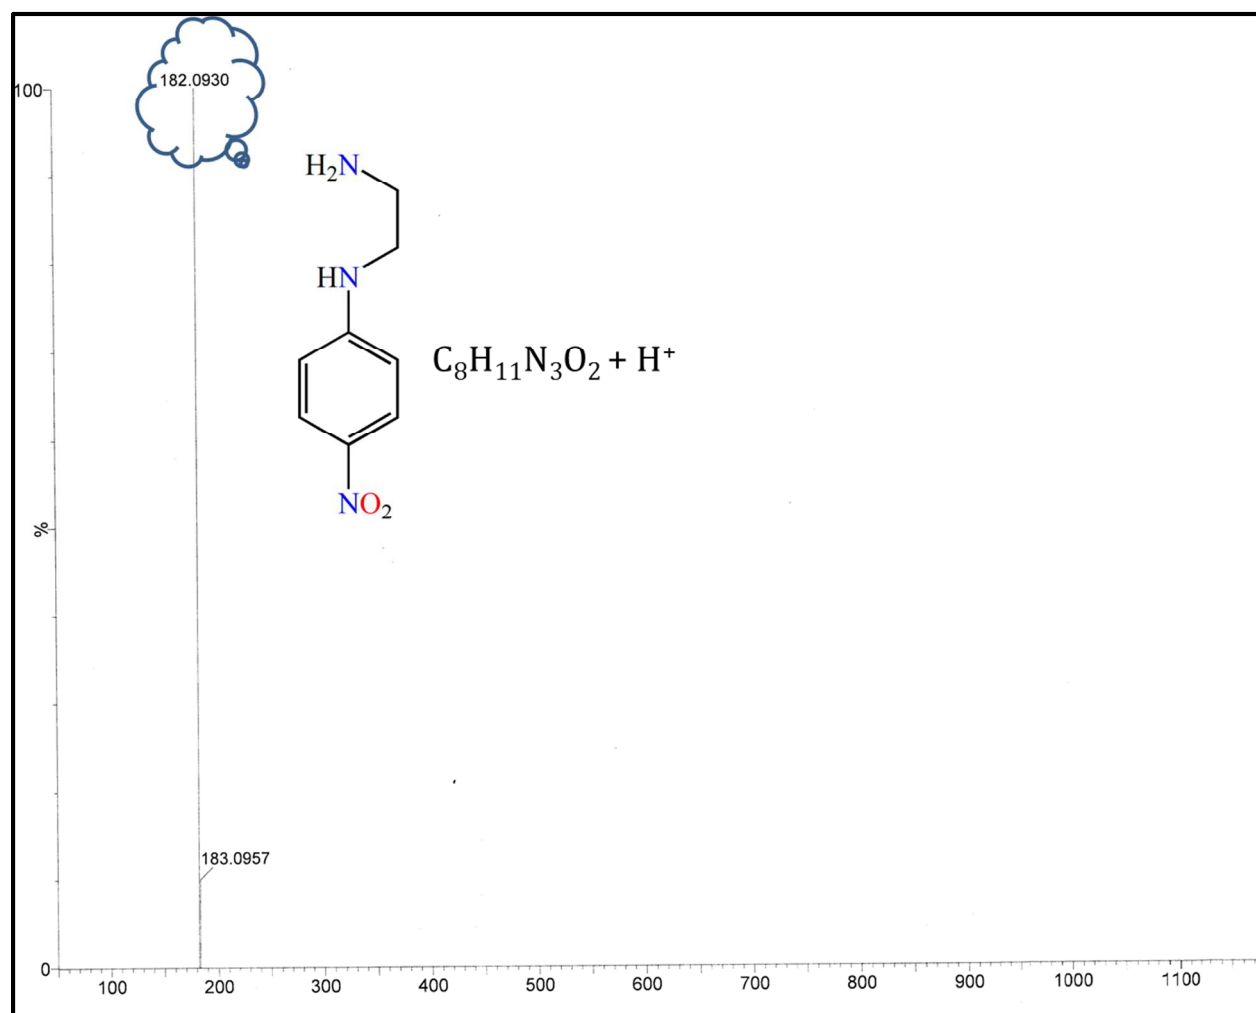

Figure S2. Mass spectra of  $L^1$  in  $CH_3CN$ .

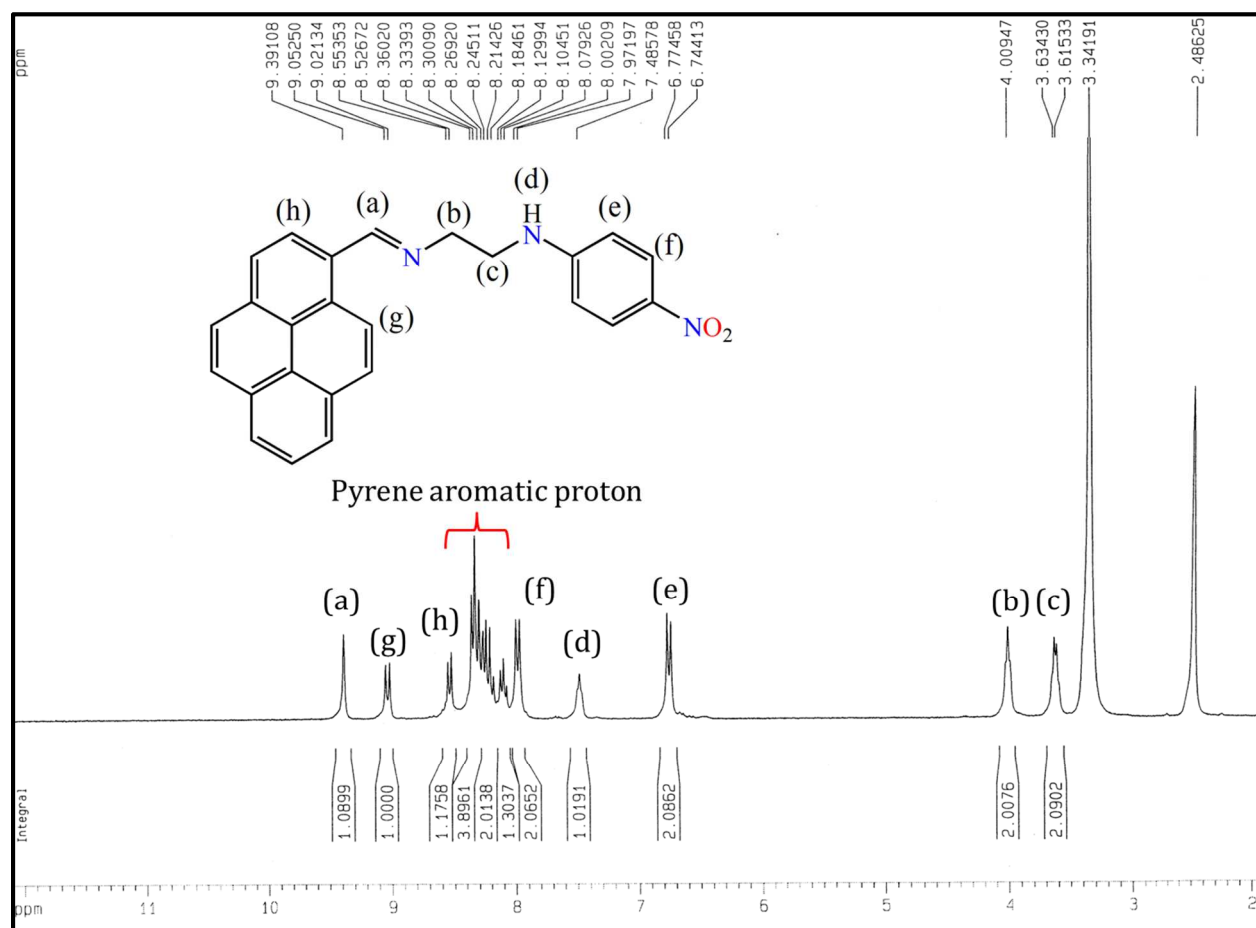

Figure S3.  $^1\text{H}$ -NMR spectrum of PyDA-NP in DMSO- $\text{d}_6$ .

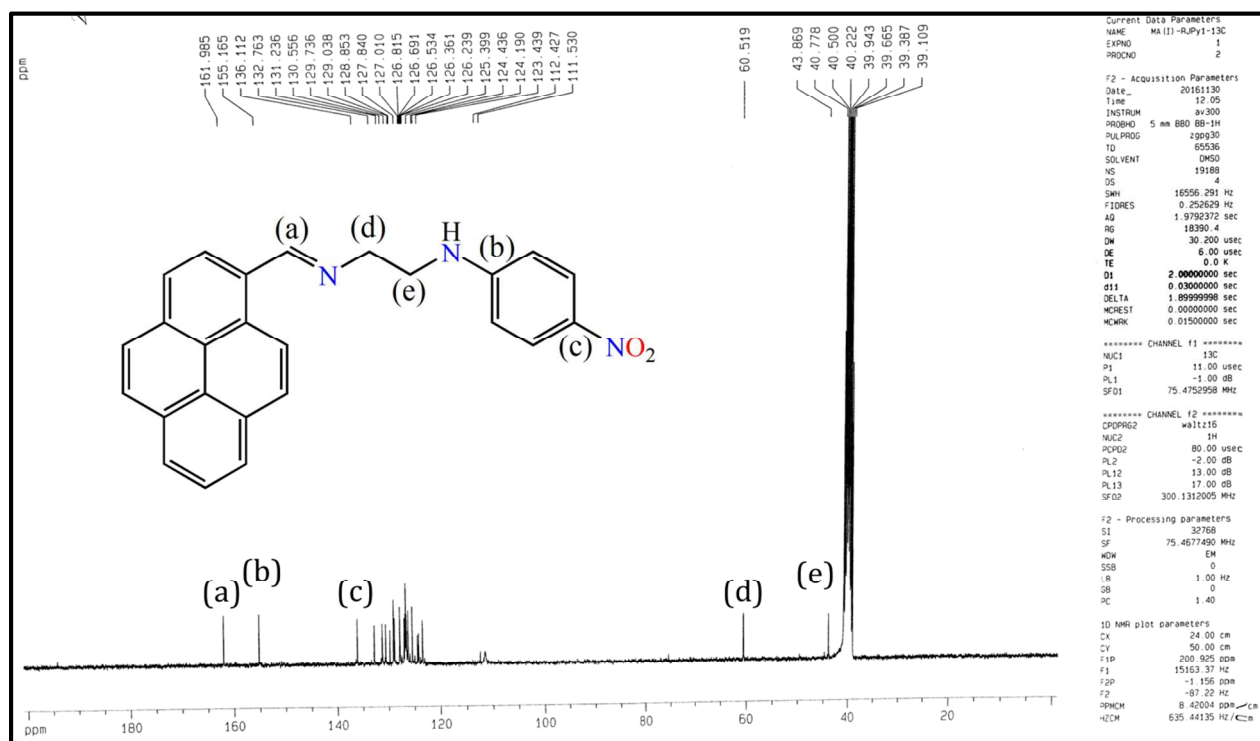

Figure S4.  $^{13}\text{C}$ -NMR spectrum of PyDA-NP in  $\text{DMSO-d}_6$ .

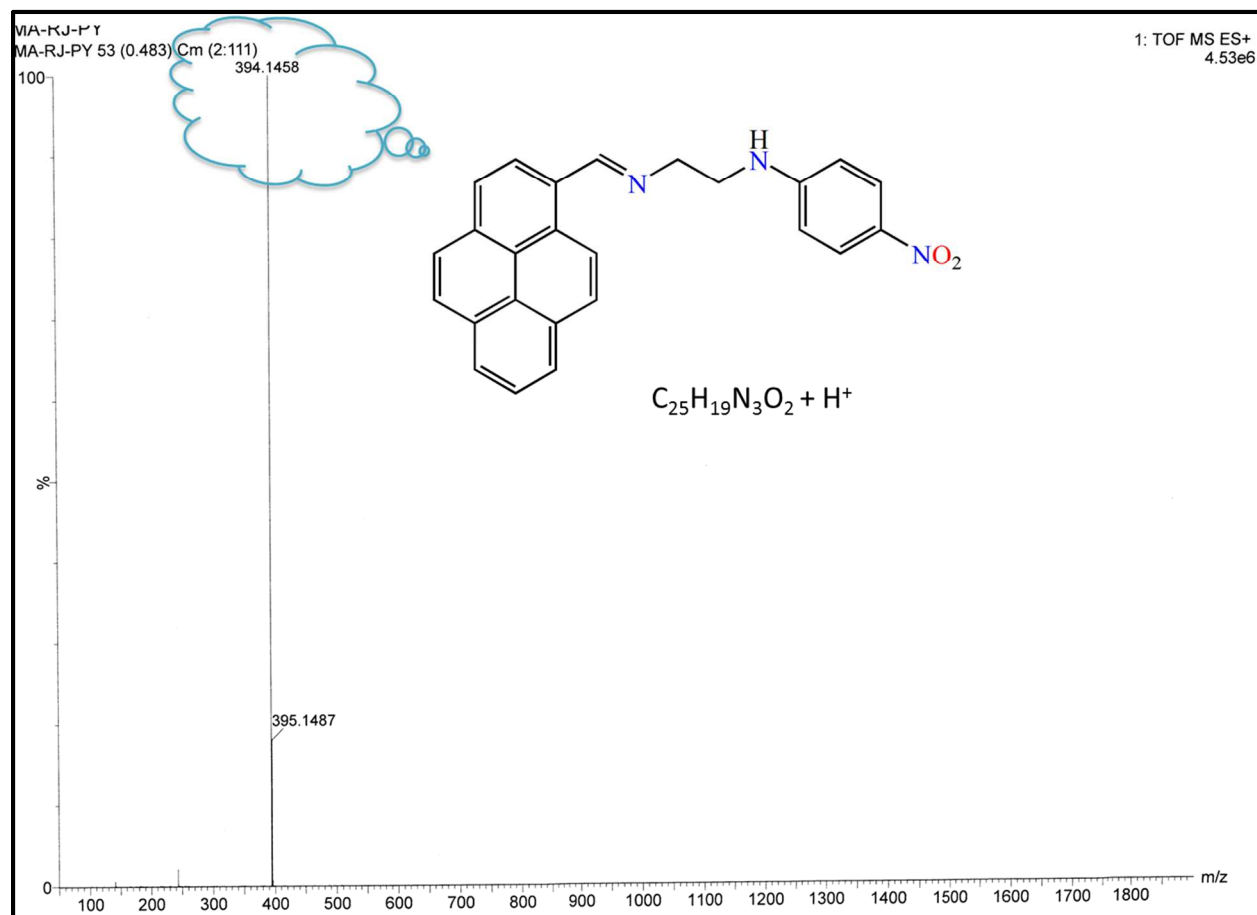

Figure S5. Mass spectra of PyDA-NP in CH<sub>3</sub>CN.

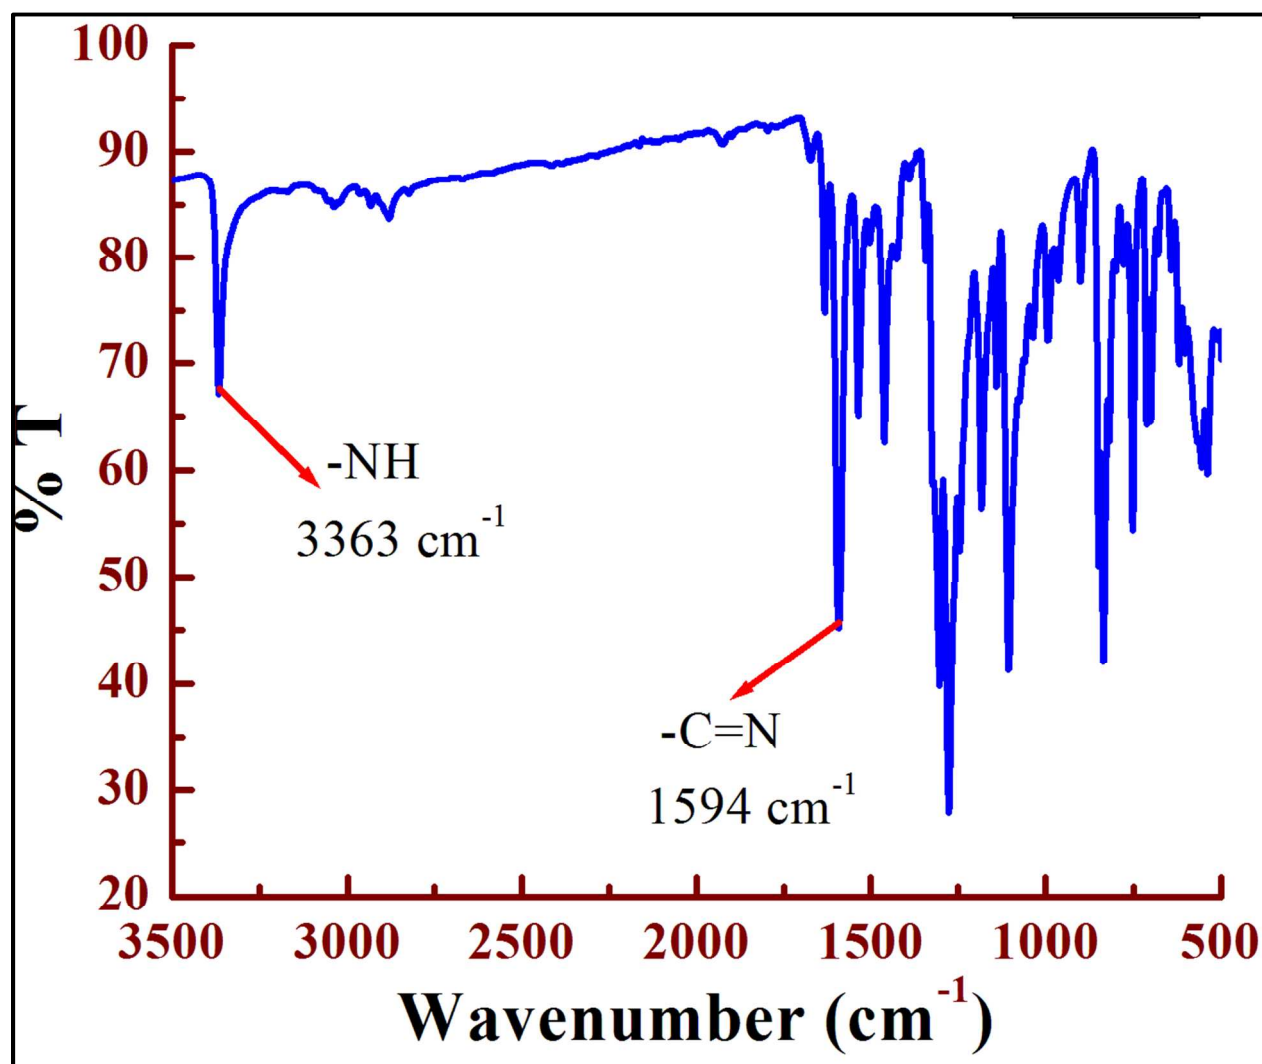

Figure S6. IR spectrum of PyDA-NP.



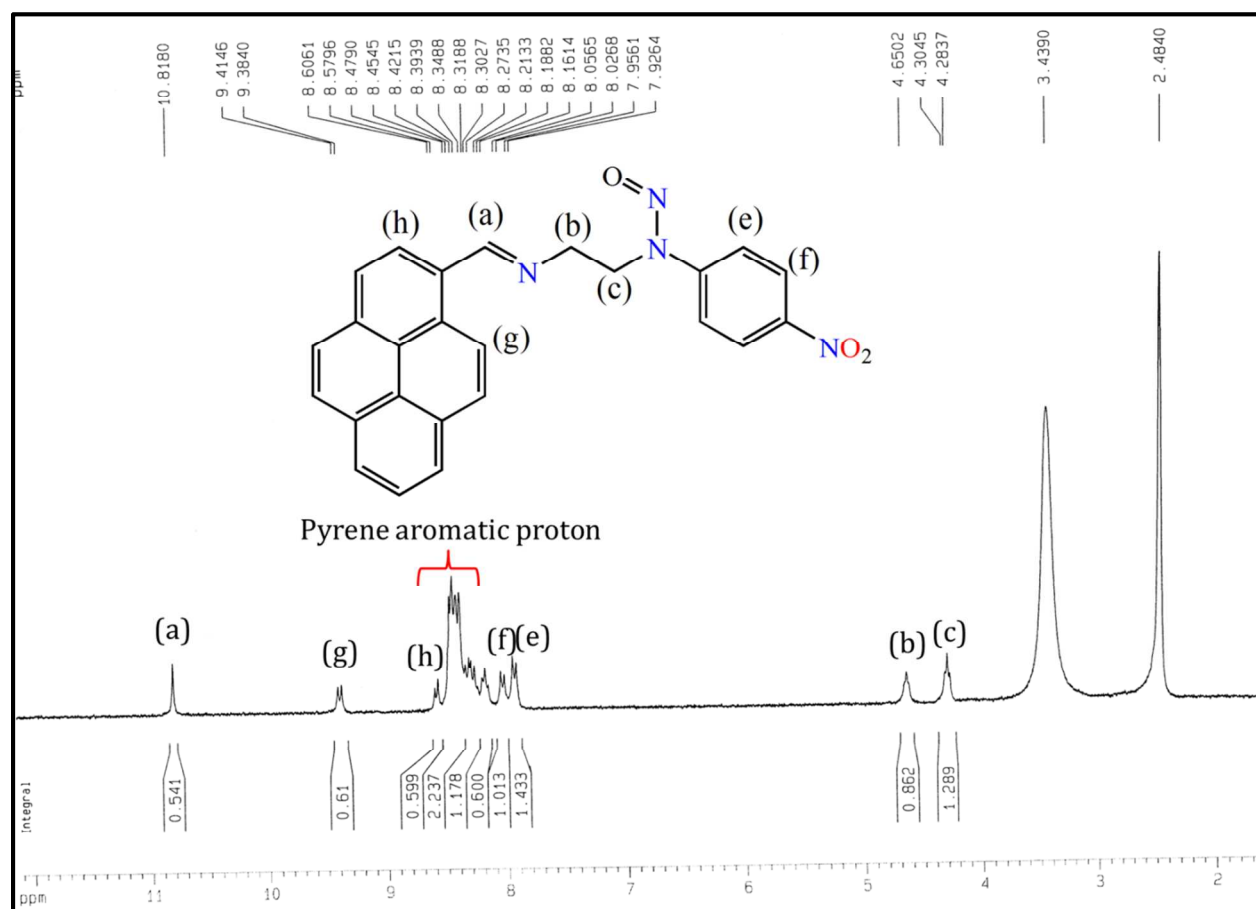

Figure S7.  $^1\text{H}$ -NMR spectrum of PyDA-NP-NO in DMSO- $d_6$ .

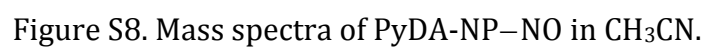

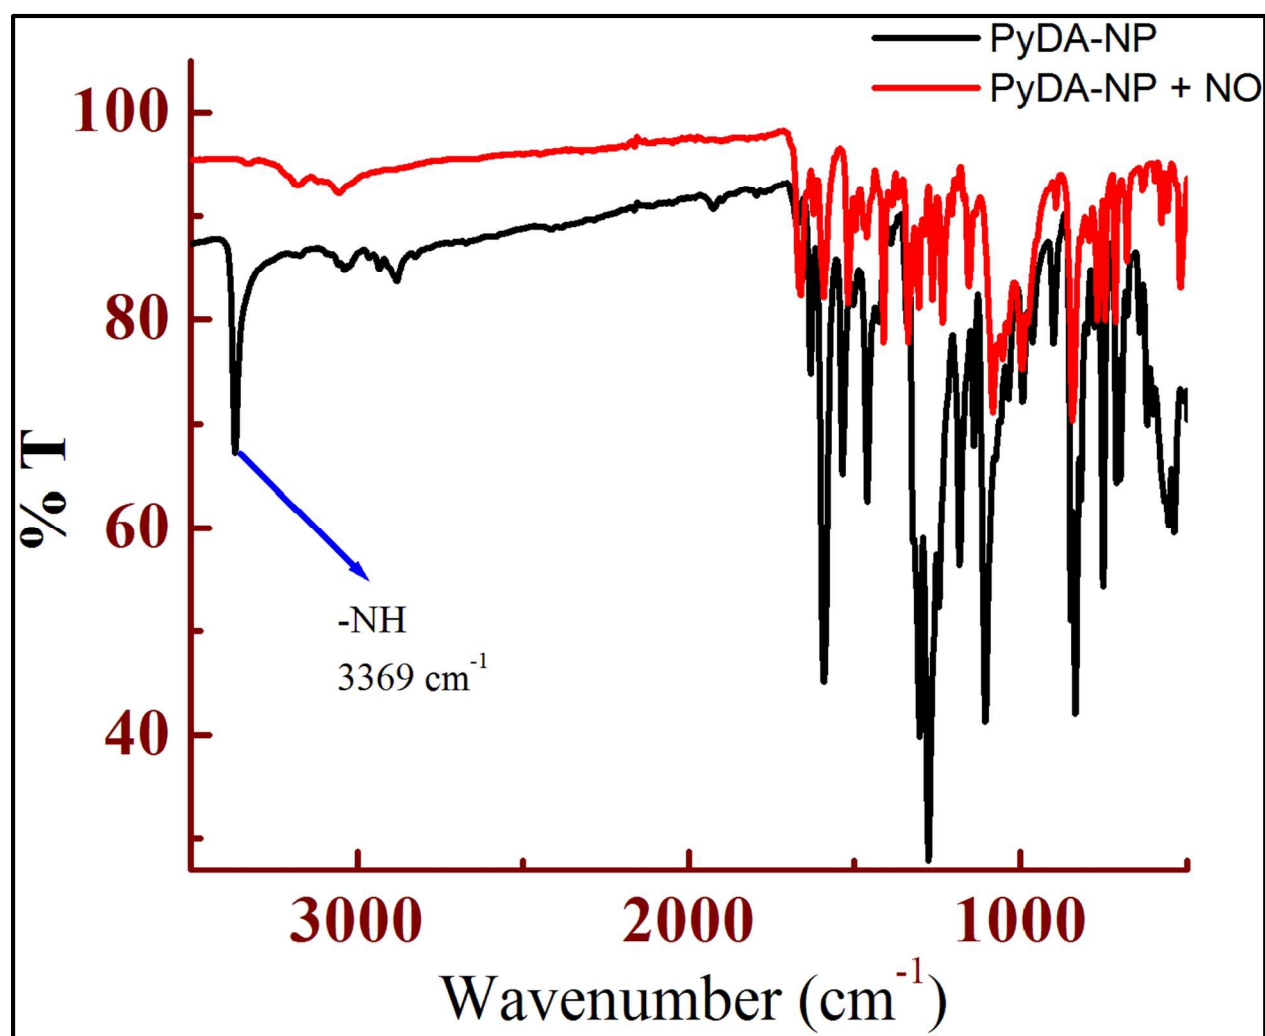

Figure S9. (a) IR spectrum of PyDA-NP–NO.

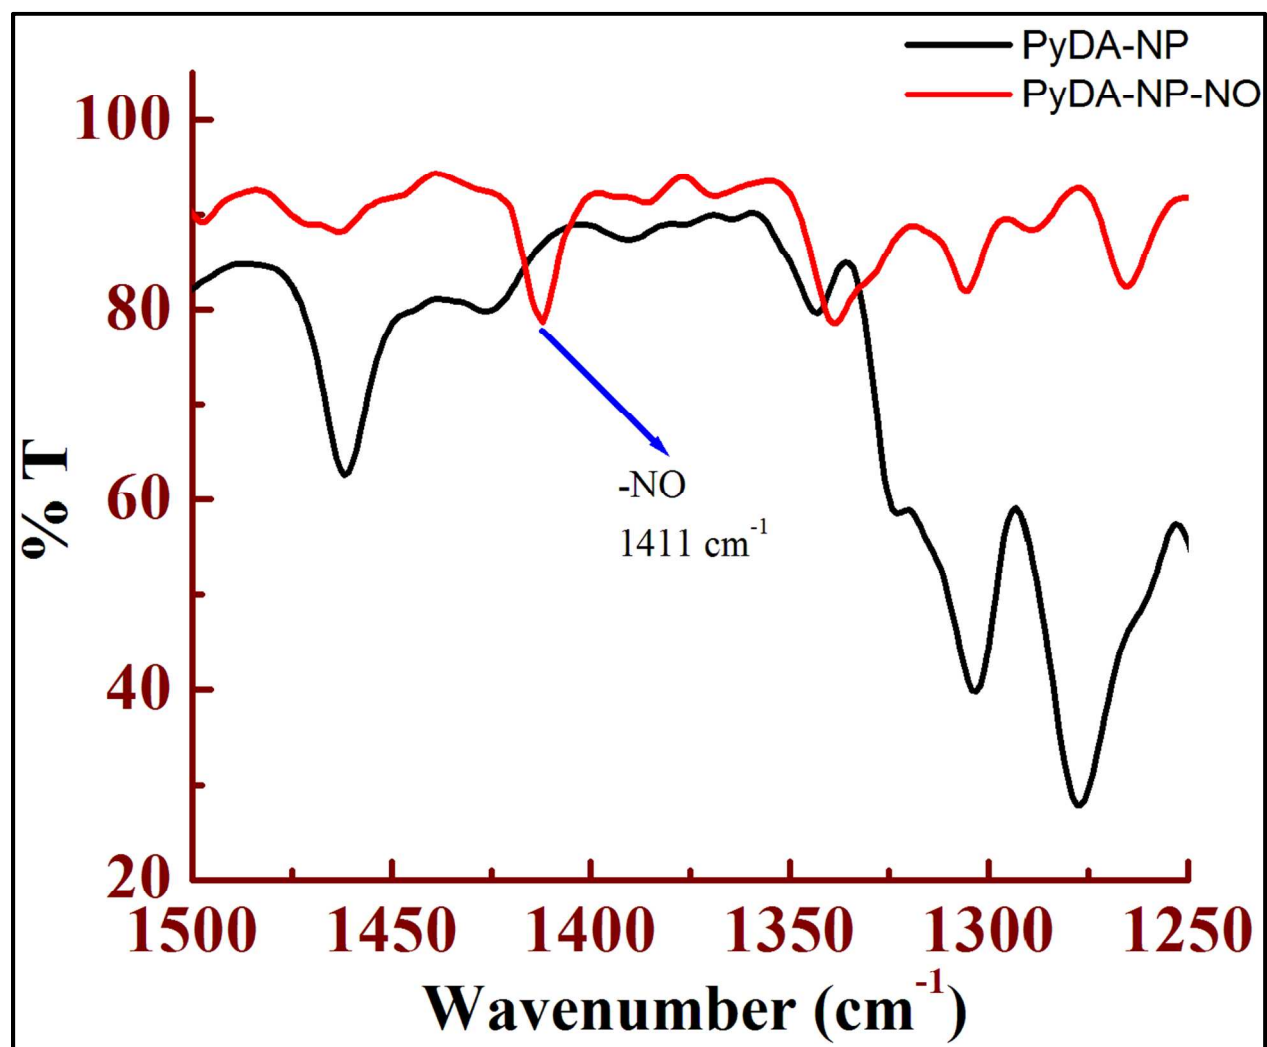

Figure S9. (b) IR spectrum of PyDA-NP-NO.

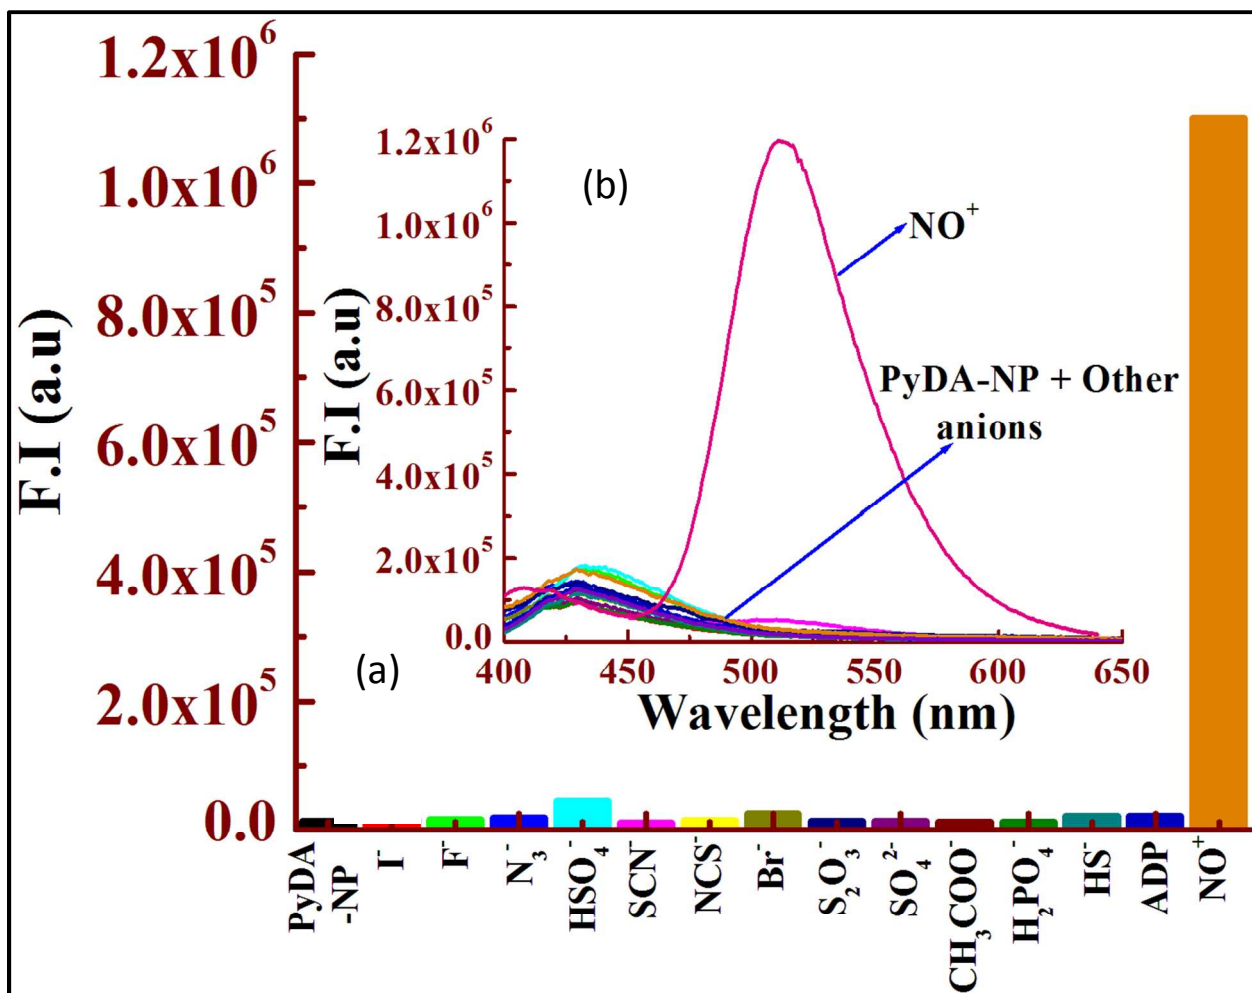

Figure S10a. (a) Bar chart illustrating fluorescence response of PyDA-NP at  $\sim 523$  nm ( $\lambda_{\text{ex}} = 390$  nm) towards different anions in 5% H<sub>2</sub>O CH<sub>3</sub>CN; (b) Spectral plot PyDA-NP in presence of different anions and NO. PyDA-NP = 10  $\mu$ M, X<sup>n-</sup> = 100  $\mu$ M.

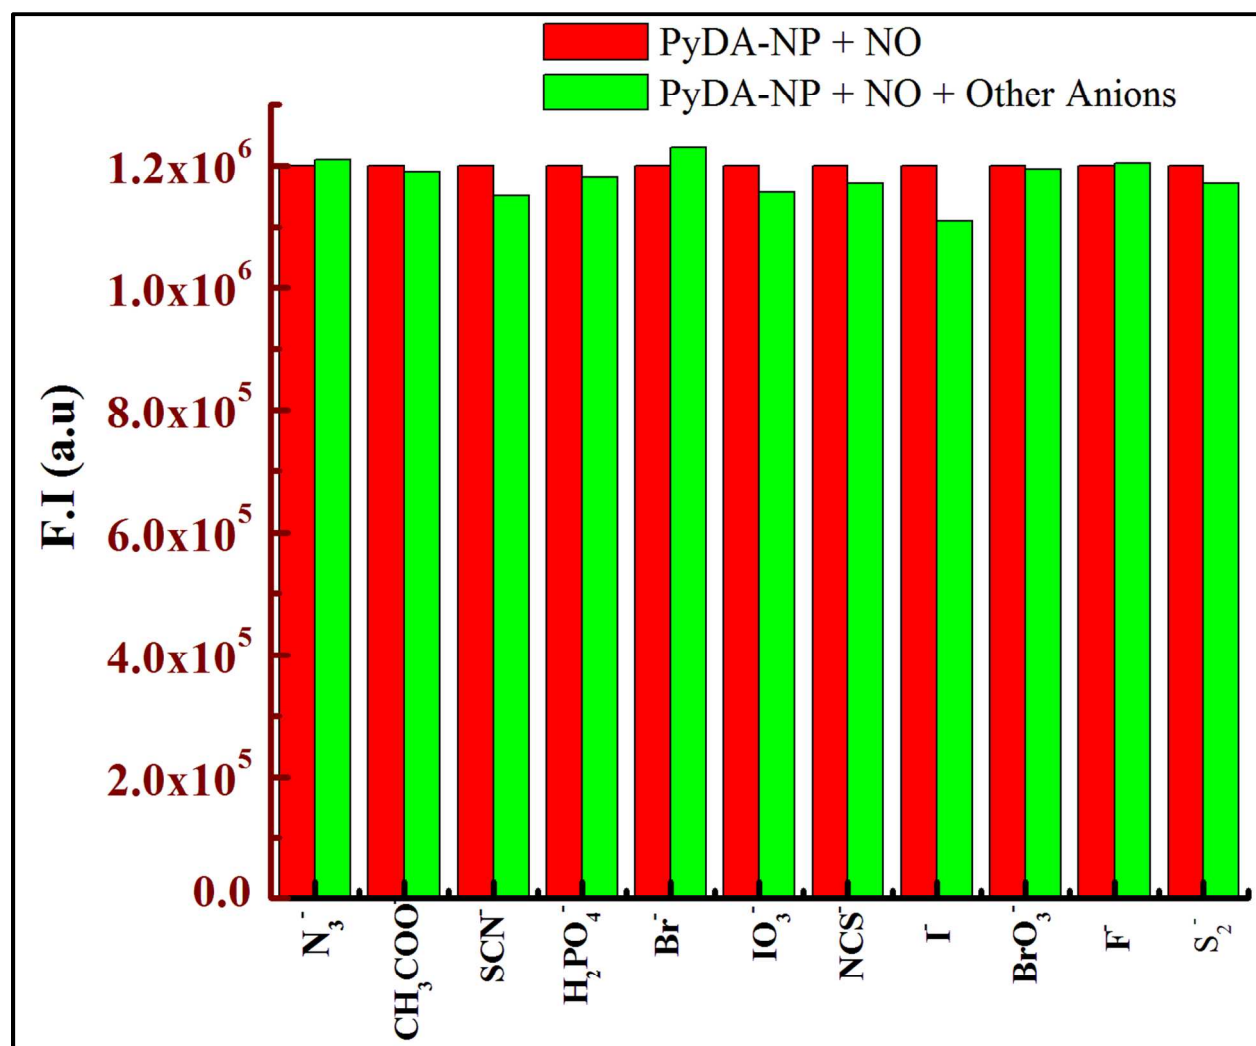

Figure S10b. Bar chart illustrating fluorescence response of PyDA-NP-NO at  $\sim 523$  nm ( $\lambda_{ex}$  = 390 nm) towards different anions in 5%  $H_2O$   $CH_3CN$ ;  $X^{n+} = 100 \mu M$ ,  $X^{n-} = 100 \mu M$ .

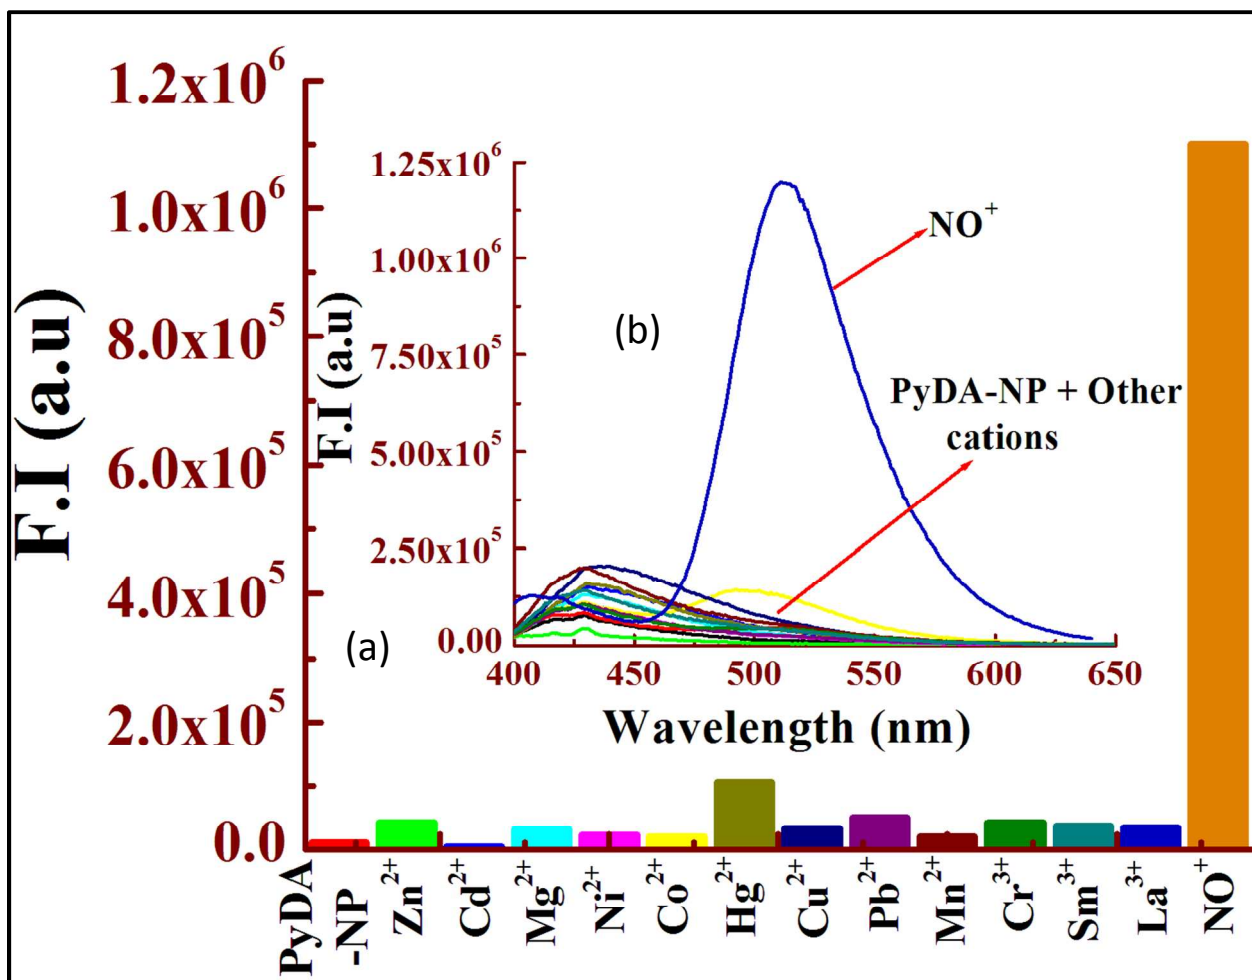

Figure S11a. (a) Bar chart illustrating fluorescence response of PyDA-NP at  $\sim 523$  nm ( $\lambda_{ex}$  = 390 nm) towards different cations in 5%  $H_2O$   $CH_3CN$ ; (b) Spectral plot PyDA-NP in presence of different cations and NO. PyDA-NP = 10  $\mu M$ ,  $X^{n+}$  = 100  $\mu M$ .

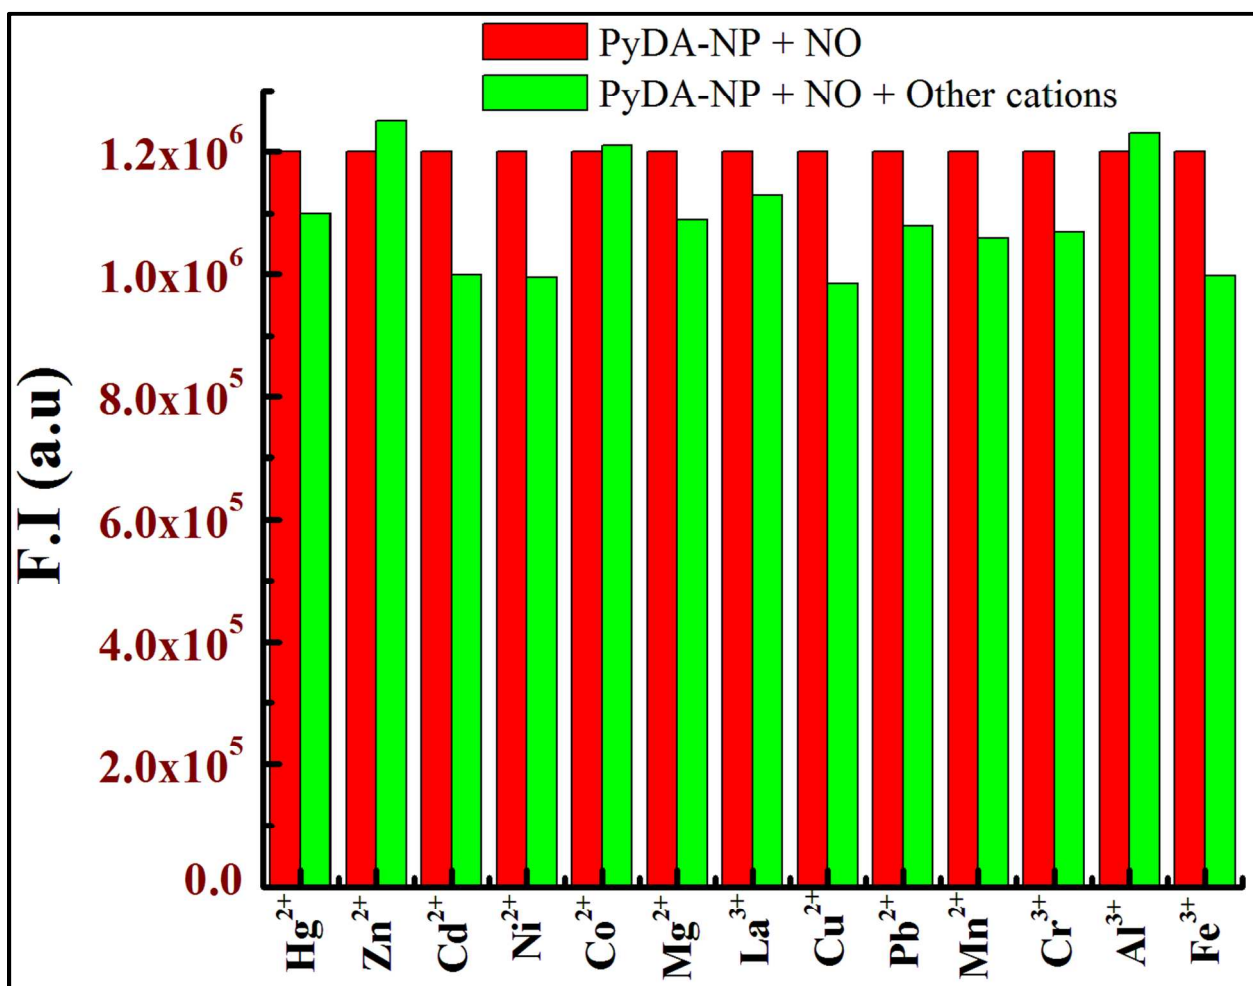

Figure S11b. Bar chart illustrating fluorescence response of PyDA-NP-NO at  $\sim 523$  nm ( $\lambda_{\text{ex}} = 390$  nm) towards different cations in 5% H<sub>2</sub>O CH<sub>3</sub>CN;  $X^{n+} = 100$   $\mu$ M.



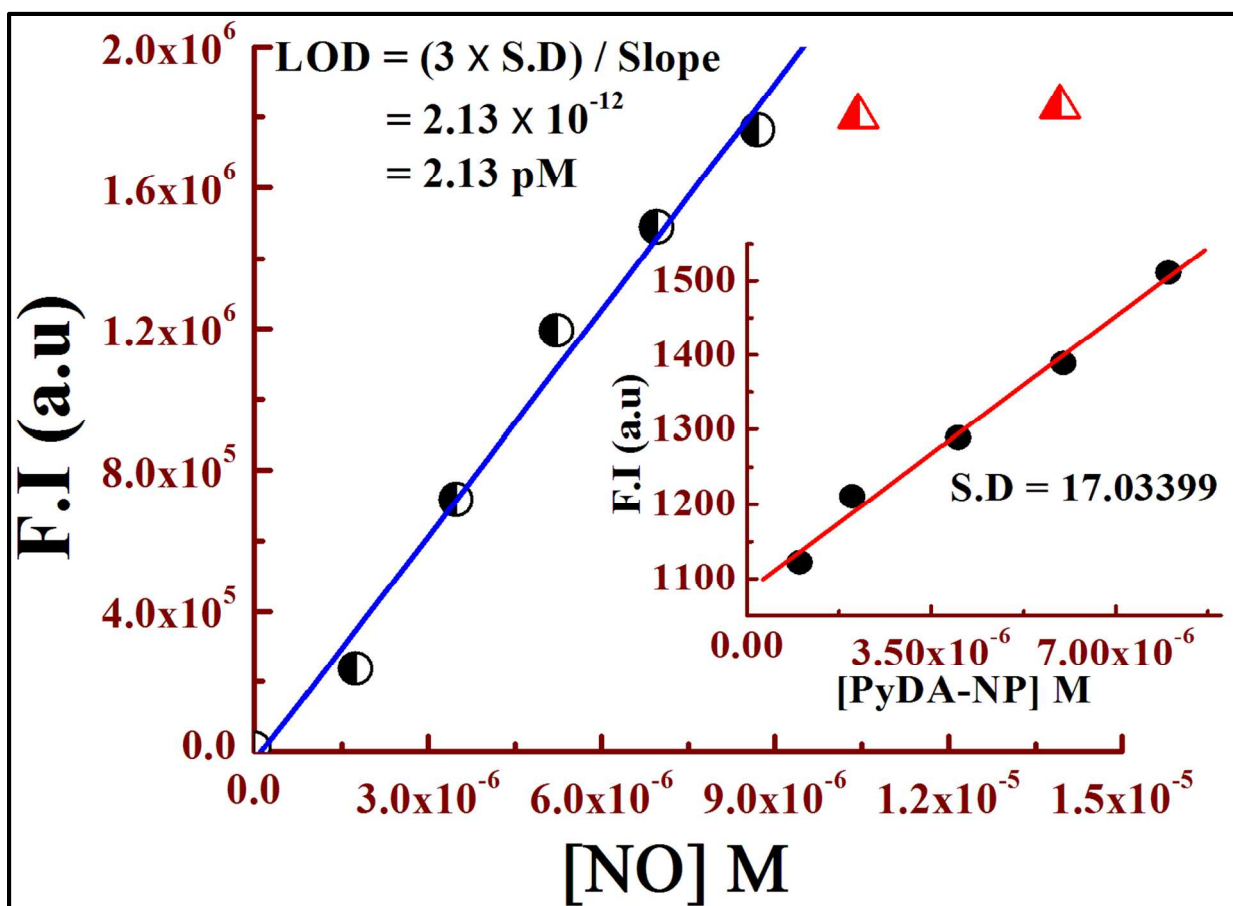

Figure S12. (a) Determination of LOD of PyDA-NH-NO.

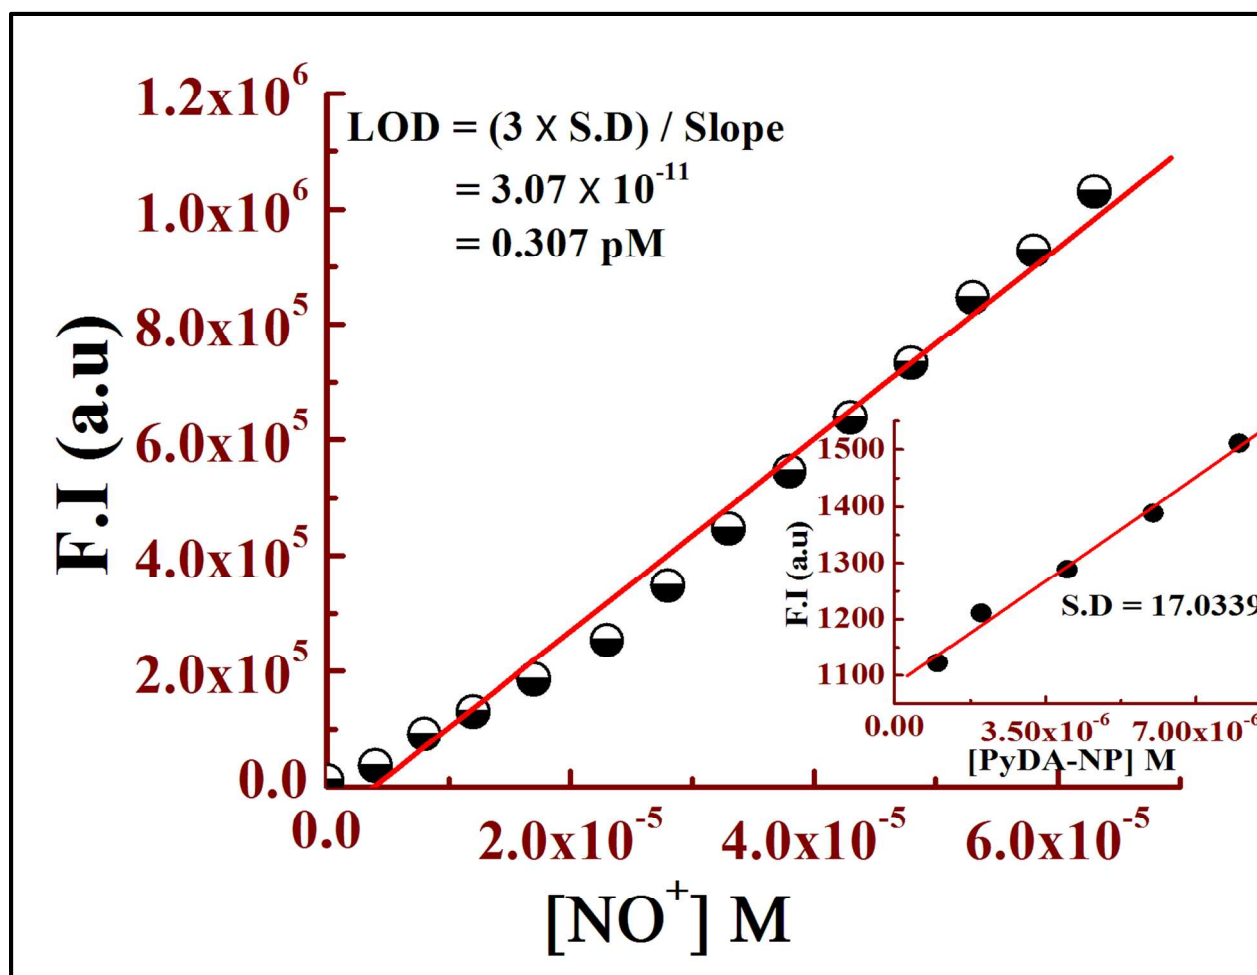

Figure S12. (b) Determination of LOD of PyDA-NH–NO<sup>+</sup>.

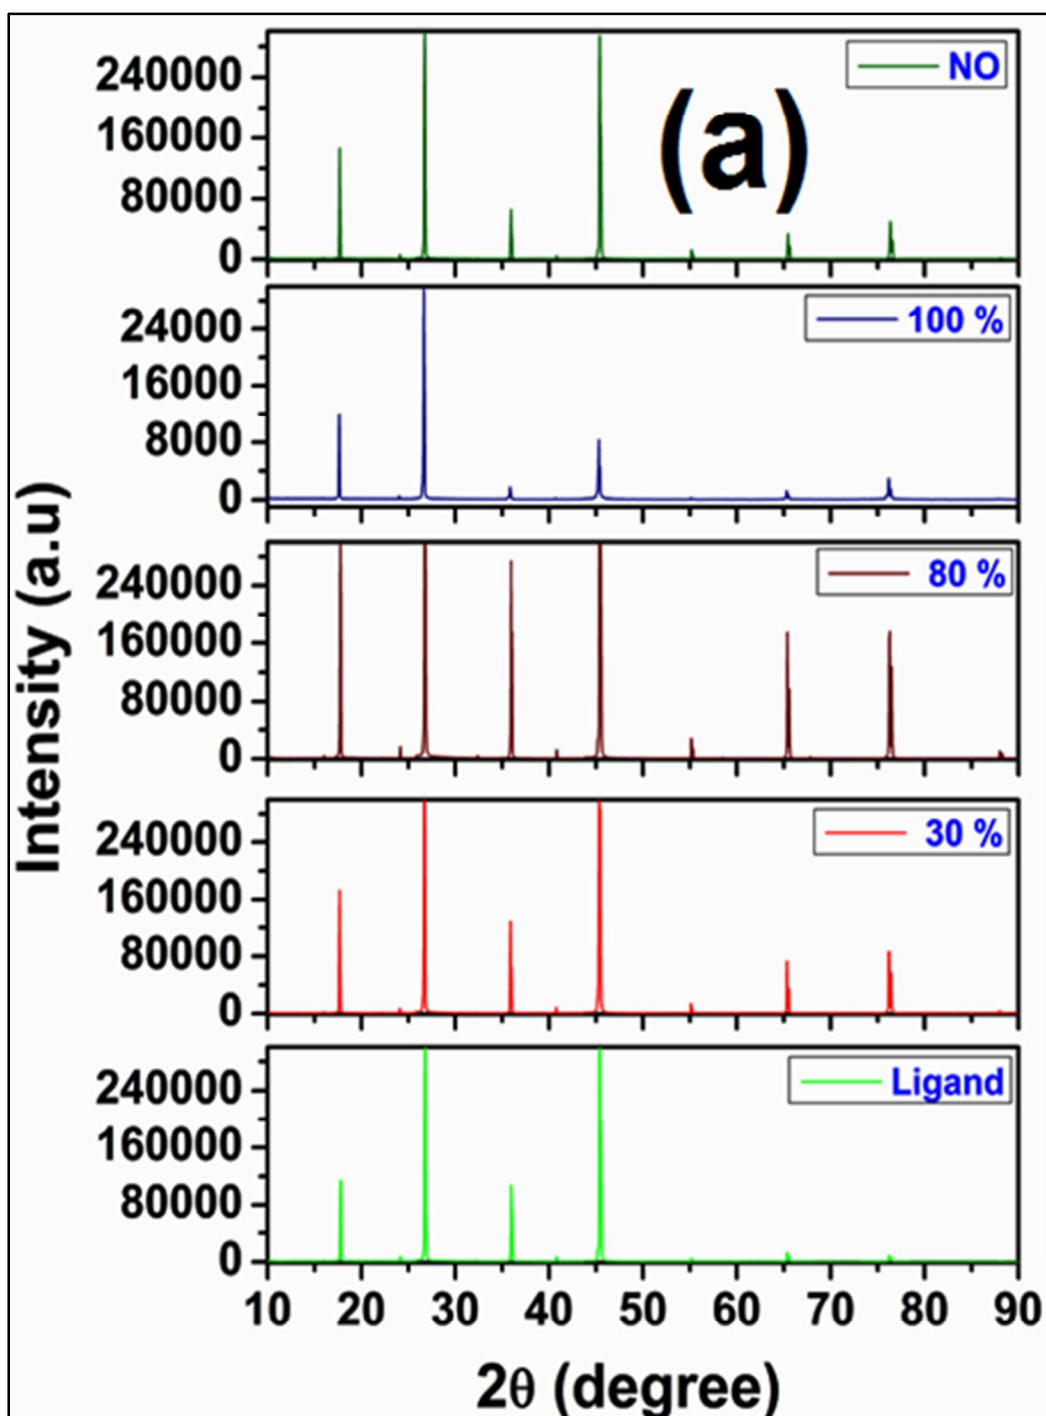

Figure S13. X-ray diffraction patterns of stack images of (a) PyDA-NP (10  $\mu$ M) in  $\text{CH}_3\text{CN}$ , PyDA-NP (10  $\mu$ M) at 30 %, 80 %, 100 % (water/ $\text{CH}_3\text{CN}$ ) and  $\text{NO}^+$  (80  $\mu$ M) in 5 % (water/ $\text{CH}_3\text{CN}$ ).

Table S1. Crystallite size ( $D$ ) and dislocation density ( $\delta$ ) at different peaks of hybrid PyDA-NP films.

| Materials                                                                              | $2\theta$     | FWHM (rad) | D (nm) | $\delta \times 10^{-4} \text{ (nm}^{-2}\text{)}$ |
|----------------------------------------------------------------------------------------|---------------|------------|--------|--------------------------------------------------|
| PyDA-NP (10 $\mu\text{M}$ ) in $\text{CH}_3\text{CN}$                                  | $26.80^\circ$ | 0.00222    | 64.23  | 2.4239                                           |
|                                                                                        | $45.43^\circ$ | 0.00342    | 43.97  | 5.1724                                           |
| PyDA-NP (10 $\mu\text{M}$ ) at 30 %<br>(water/ $\text{CH}_3\text{CN}$ )                | $26.72^\circ$ | 0.00207    | 69.02  | 2.0992                                           |
|                                                                                        | $45.37^\circ$ | 0.00356    | 40.10  | 6.2189                                           |
| PyDA-NP (10 $\mu\text{M}$ ) at 80 %<br>(water/ $\text{CH}_3\text{CN}$ )                | $26.79^\circ$ | 0.00239    | 59.68  | 2.8076                                           |
|                                                                                        | $45.43^\circ$ | 0.00368    | 40.82  | 6.0014                                           |
| PyDA-NP (10 $\mu\text{M}$ ) at 100 %<br>(water/ $\text{CH}_3\text{CN}$ )               | $26.66^\circ$ | 0.00162    | 88.14  | 1.2872                                           |
|                                                                                        | $45.29^\circ$ | 0.00152    | 98.59  | 1.0288                                           |
| PyDA-NP + $\text{NO}^+$ (80 $\mu\text{M}$ ) in 5 %<br>(water/ $\text{CH}_3\text{CN}$ ) | $26.75^\circ$ | 0.00218    | 65.43  | 2.3358                                           |
|                                                                                        | $45.42^\circ$ | 0.00340    | 44.14  | 5.1325                                           |

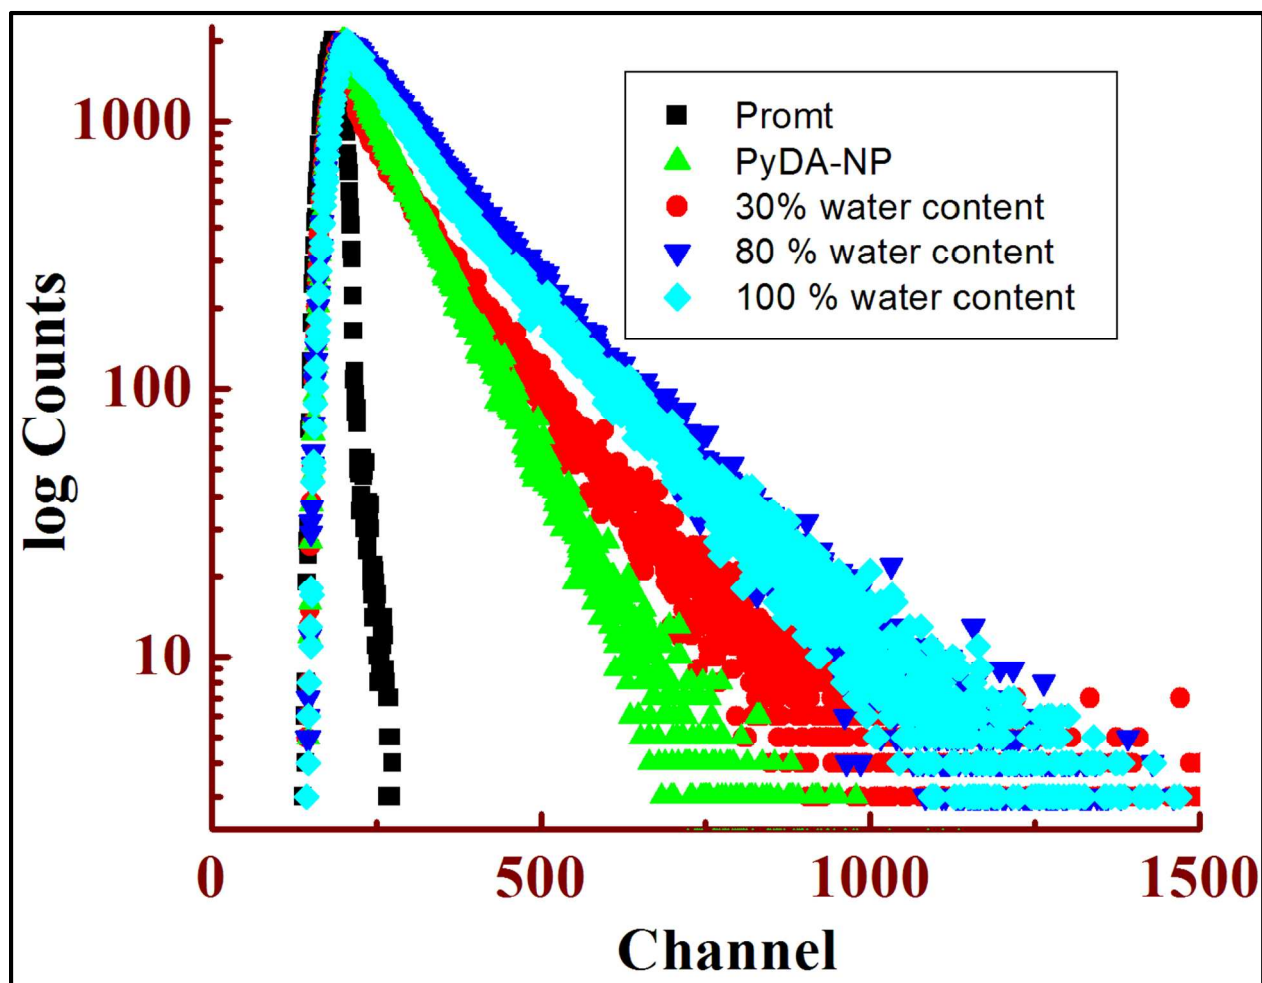

Figure S14. Fluorescence life time spectra of **PyDA-NP** at different % of water in the  $\text{H}_2\text{O}/\text{CH}_3\text{CN}$  binary mixture solution.

Table S2. Different photophysical data of **PyDA-NP** at different % of water in the H<sub>2</sub>O/CH<sub>3</sub>CN binary mixture solution.

| Sample                 | $t_{\text{avg}}$ (s) | $\phi$  | $K_r$ (s <sup>-1</sup> ) | $K_{\text{nr}}$ (s <sup>-1</sup> ) | $\chi^2$ |
|------------------------|----------------------|---------|--------------------------|------------------------------------|----------|
| <b>PyDA-NP</b>         | 8.08 E-10            | 0.00118 | 1.46E+06                 | 1.24 E+09                          | 1.071    |
| <b>PyDA-NP (30 %)</b>  | 3.37 E-09            | 0.137   | 4.07 E+07                | 2.56 E+08                          | 1.102    |
| <b>PyDA-NP (80 %)</b>  | 3.76 E-09            | 0.79    | 2.10 E+08                | 5.59 E+07                          | 1.089    |
| <b>PyDA-NP (100 %)</b> | 1.02 E-10            | 0.188   | 1.84 E+09                | 7.96 E+09                          | 1.115    |

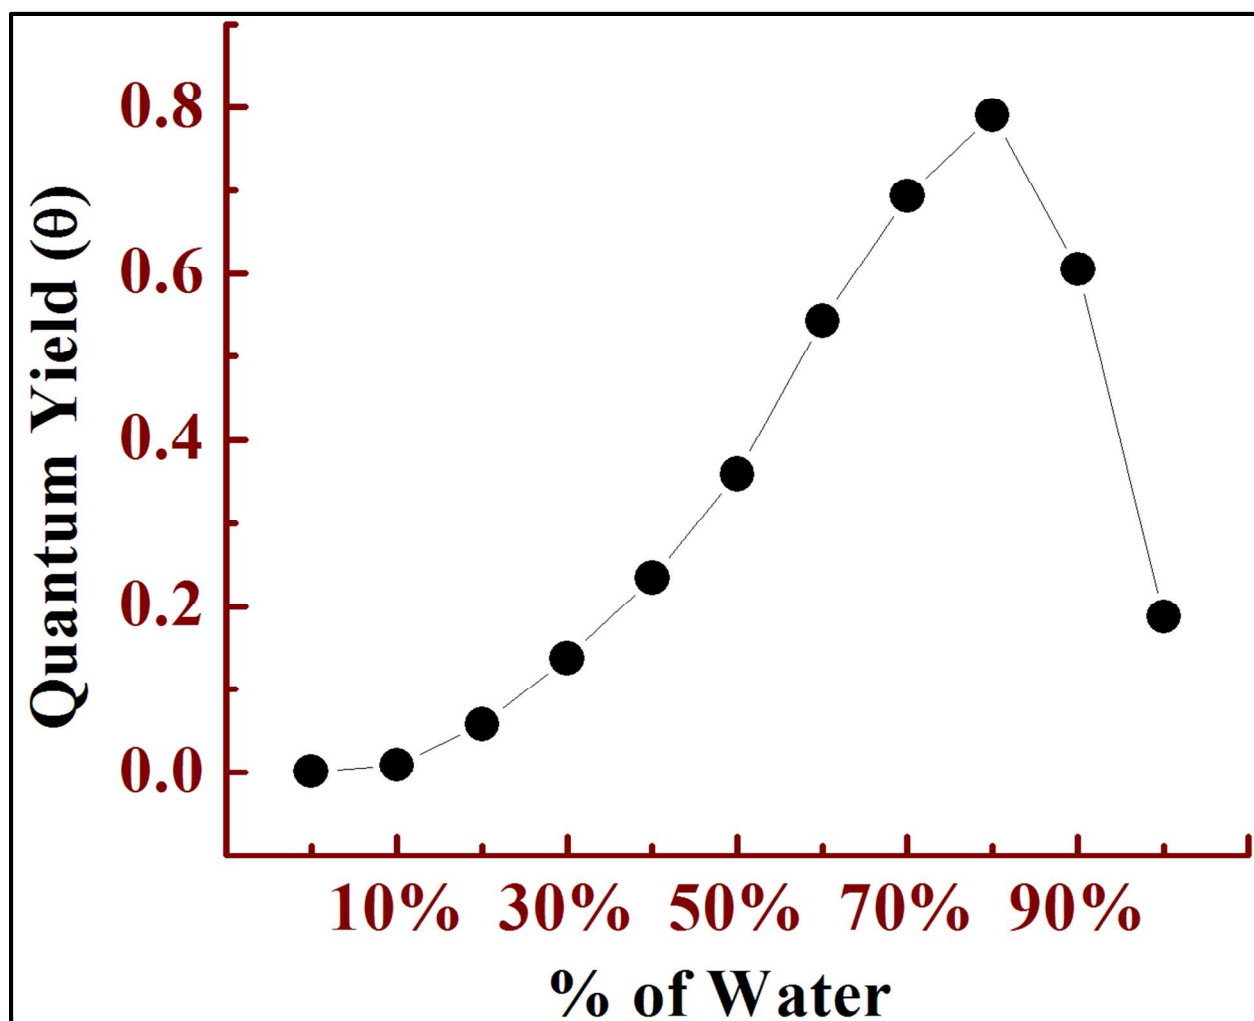

Figure S15. Plot of Quantum Yield vs % of water and  $\text{CH}_3\text{CN}$  of PyDA-NP.

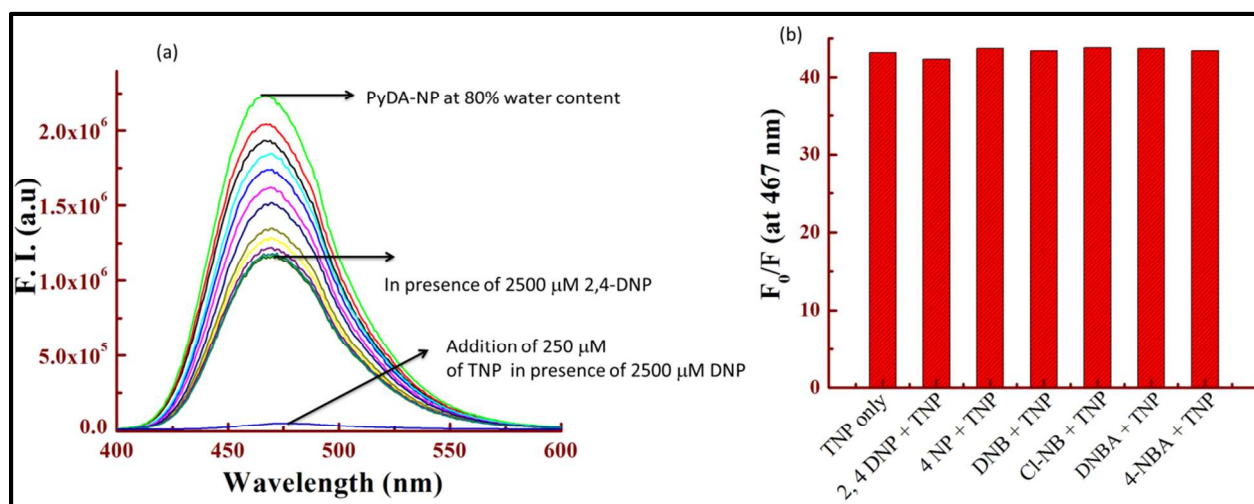

Figure S16. (a) Titration with 2,4-DNP up to 2500  $\mu$ M and then addition of 250  $\mu$ M TNP. (b) Over selectivity study for TNP.



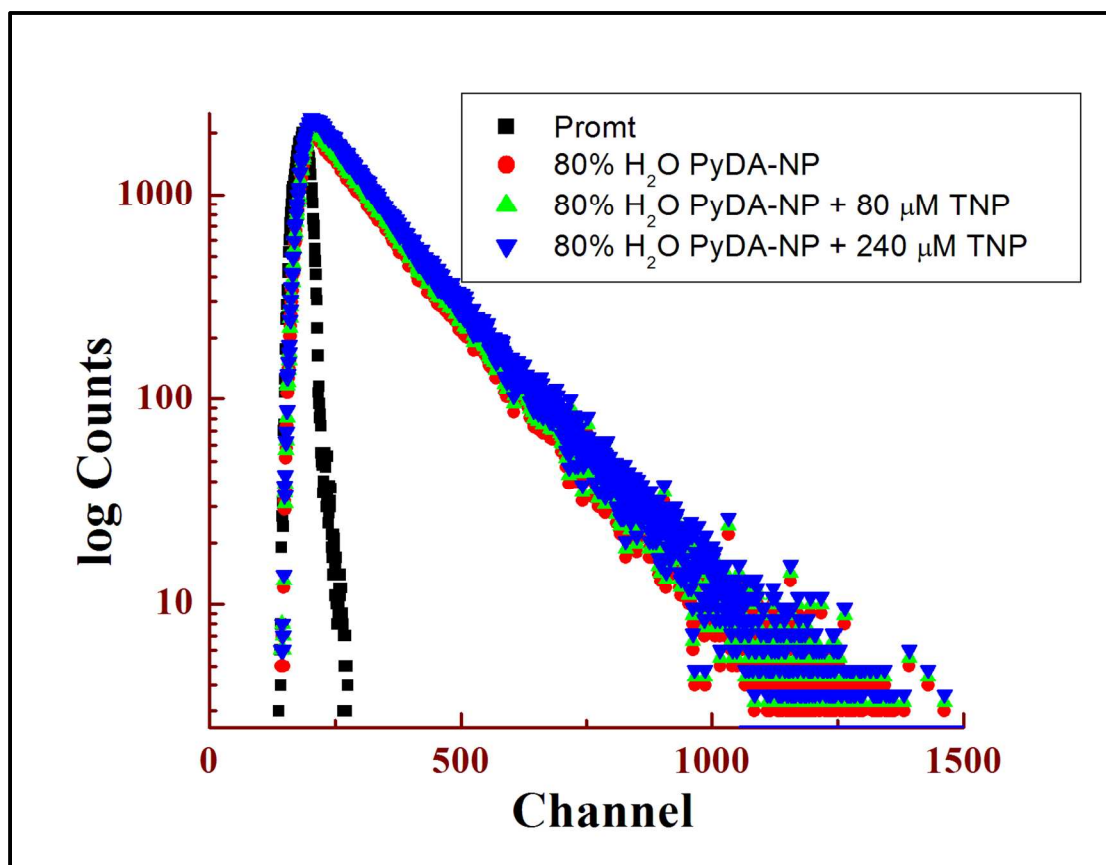

Figure S17. Fluorescence life time spectra of **PyDA-NP** at 80 % of water in the presence of different concentration of TNP.

Table S3. Fluorescence life time data of **PyDA-NP** at 80 % of water in the presence of different concentration of TNP.

| Sample                                                   | $t_{\text{avg}}$ (s) | $\chi^2$ |
|----------------------------------------------------------|----------------------|----------|
| <b>PyDA-NP (80 %)</b>                                    | 3.76 E-09            | 1.133    |
| <b>PyDA-NP (80 %) + 80 <math>\mu\text{M}</math> TNP</b>  | 3.79 E-09            | 1.048    |
| <b>PyDA-NP (80 %) + 240 <math>\mu\text{M}</math> TNP</b> | 3.81 E-09            | 1.052    |

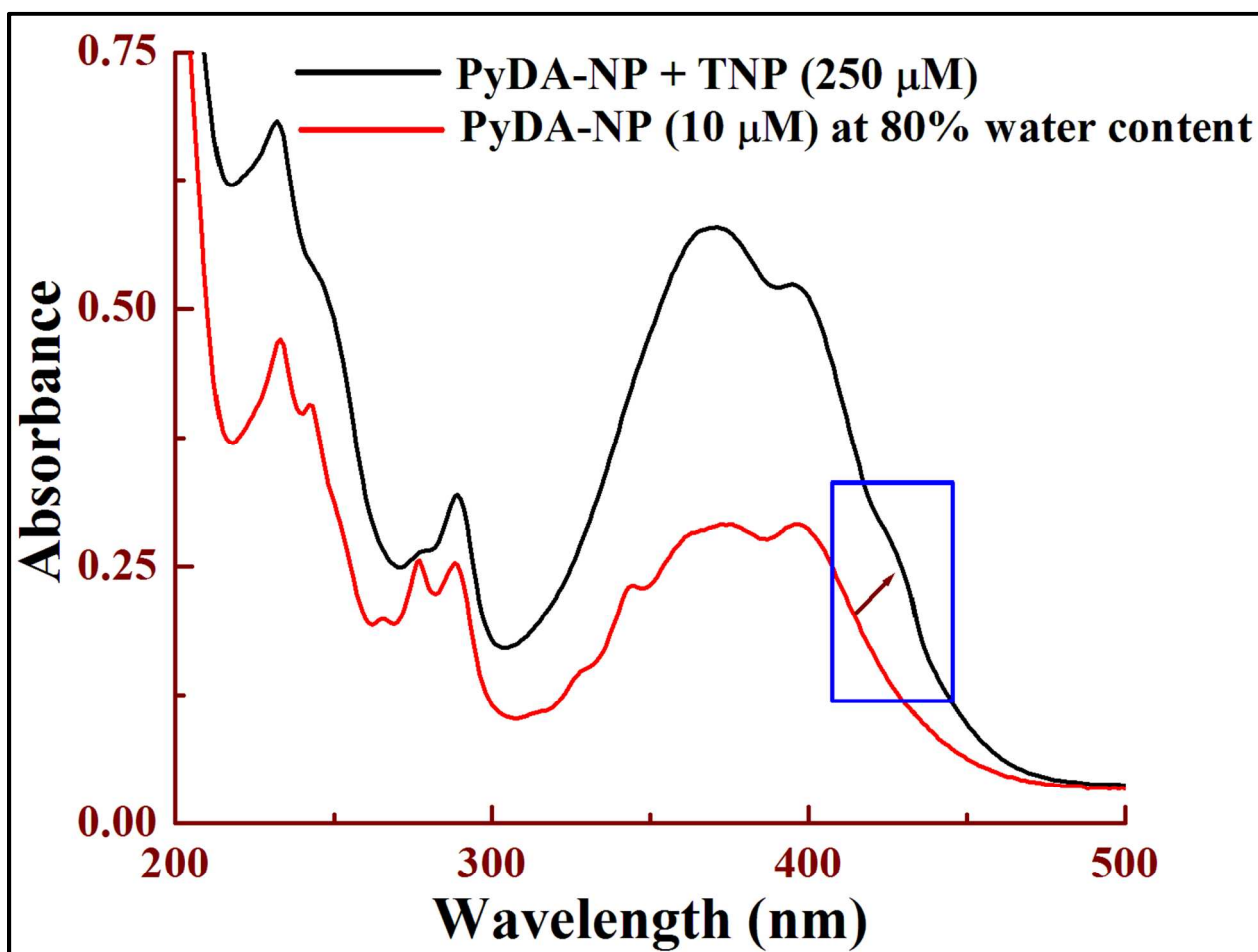

Figure S18. UV-Vis absorption spectrum of the PyDA-NP (10  $\mu$ M) at AIEE state (80% water) in the presence of TNP (240  $\mu$ M).
